# Supplementary material
Source: PubMed Central journal article supplement (PMC2258454)
Supplement: ajrcmb_38_3_346__1.pdf [file ajrcmb_38_3_346__1.pdf]

P21 Regulates TGF- $\beta_1$ -Induced Pulmonary Responses via a TNF- $\alpha$ -Signaling Pathway

Masashi Yamasaki, Ph.D.<sup>1#</sup>, Hye -Ryun Kang, M.D., Ph.D.<sup>1#</sup>,  
Robert J. Homer, M.D., Ph.D.<sup>2</sup>, Svetlana P. Chapoval, M.D., Ph.D.<sup>1</sup>  
Soo Jung Cho, M.D.<sup>1</sup> Byung Jae Lee, M.D., Ph.D.<sup>1</sup> Jack A. Elias, M.D.<sup>1</sup> and  
Chun Geun Lee, M.D., Ph.D.<sup>1,4</sup>

Online Data Supplement

Online Supplemental Materials

TGF-β(-)/p21(+/+).

TGF-β(+)/p21(-/-).

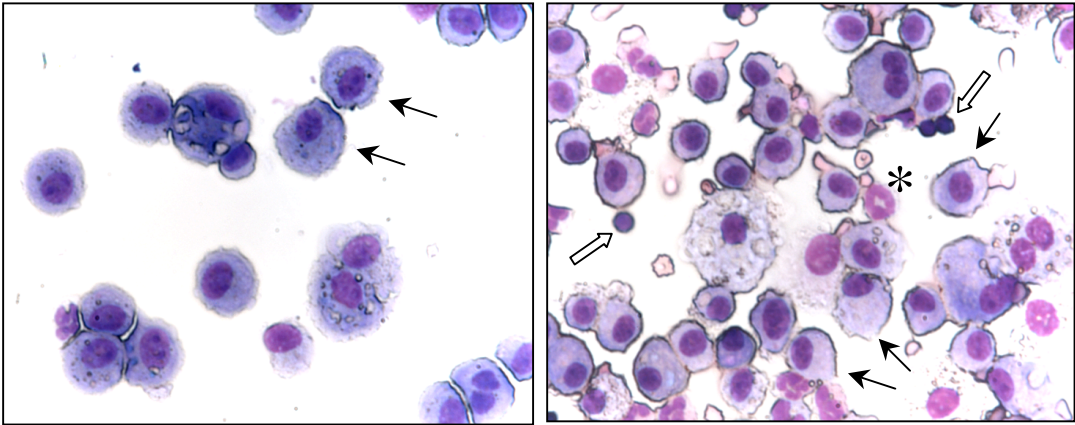

**Figure E1. BAL cytologies of TGF-β(-)/p21(+/+) and TGF-β(+)/p21(-/-).** After 1 month of Dox induction, BAL cytology was prepared. TGF-β(+)/p21(-/-) mice demonstrates macrophage dominant inflammation with minor infiltration of lymphocytes (open arrow) and eosinophil (\*).

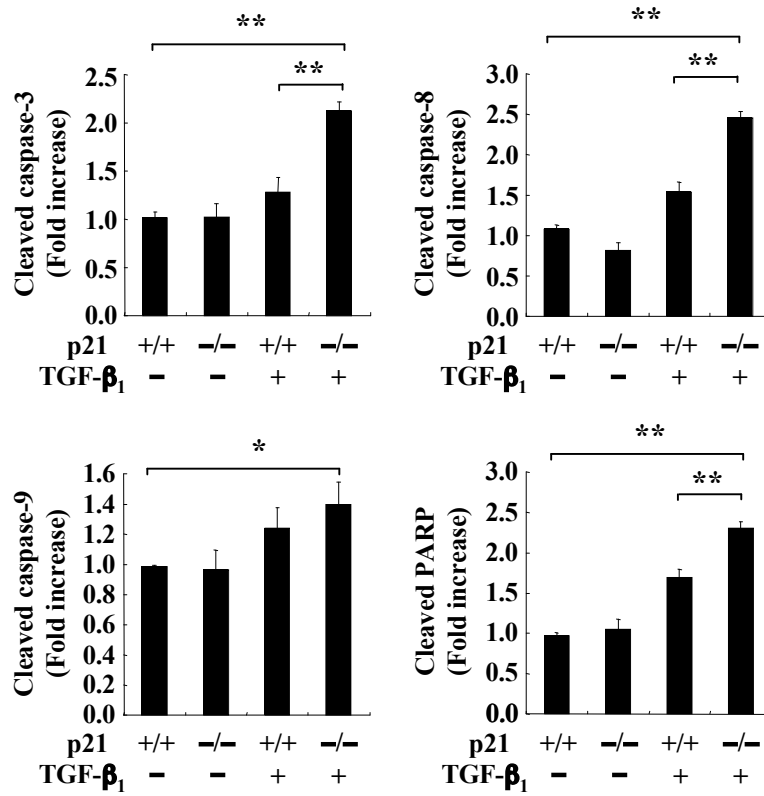

**Figure E2. Caspase activation in the lung of TGF-β<sub>1</sub> transgenic mice with and without p21 null mutation.** Relative fold induction of each cleaved fragments were evaluated by Western analysis and subsequent densitometrical quantitation. The values represent the mean±SEM of evaluations in a minimum of 5 animals (\*p<0.05, \*\*p<0.01).

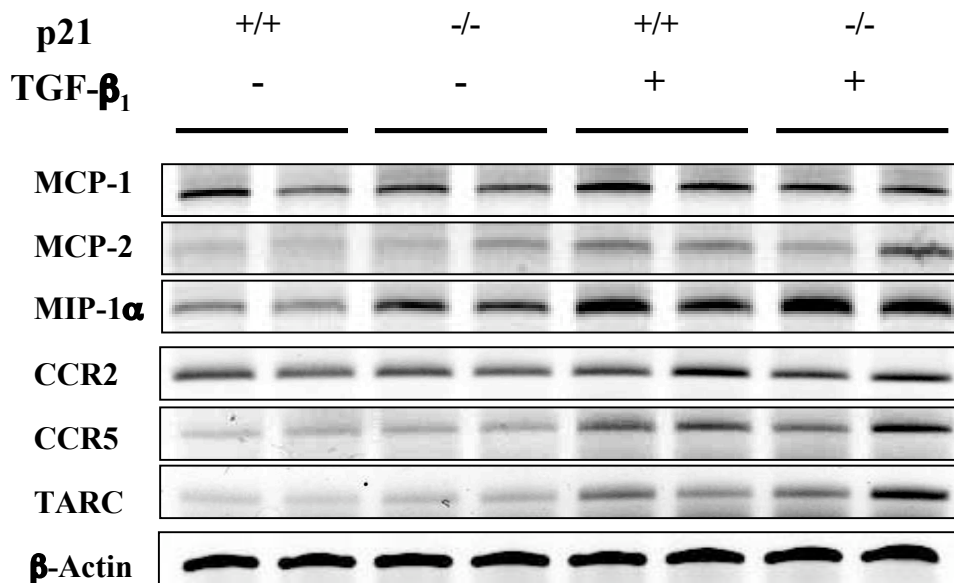

**Figure E3. mRNA expression of selected chemokines and chemokine receptors in wild type and TGF- $\beta_1$  transgenic mice with and without p21 null mutation.** The relative mRNA expression was evaluated using semiquantitative RT-PCR.

**Normal Region**

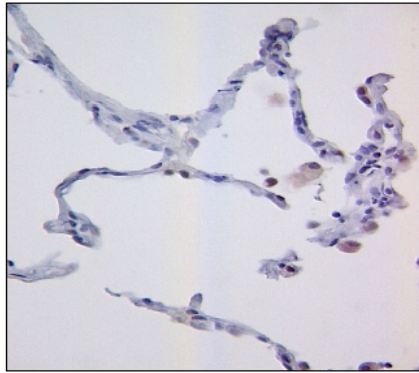

**Fibrotic Region**

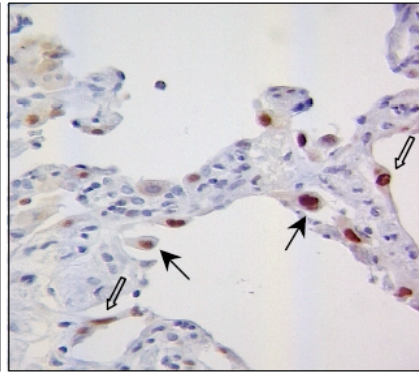

**Figure E4. Immunohistochemical localization of p21 in lungs from patients with pulmonary fibrosis.** P21 positive cells were stained with brown colors. Closed and open arrows indicate macrophages and epithelial cells, respectively (10X original magnification).
